# Supplementary material
Source: PubMed Central journal article supplement (PMC5159750)
Supplement: NIHMS832998-supplement-01.pdf [file NIHMS832998-supplement-01.pdf]

## Supplemental information

### *Diffusion calculations*

Interferons and other antiviral cytokines are smaller than virus particles, so they are able to diffuse more rapidly through semi-solid gels or liquid media. Cytokines and virus particles are also produced by cells with characteristic time-delays which may be estimated from experiments. When processes of diffusion and production are coupled, cytokines or viruses can spread spatially. For spreading infections, Ortega-Cejas et al. (Ortega-Cejas et al., 2004) have derived an approximate expression for the speed of the spread:

$$V = \sqrt{\frac{2 \cdot \mathcal{D}_{eff}}{\tau}}$$

where  $\mathcal{D}_{eff}$  is the effective diffusivity of the virus and  $\tau$  is the delay time that is characteristic of the virus production. Our data suggest the time delay  $\tau$  for virus replication and cytokine production to be approximately 3 hours and 4 hours, respectively. Further, the Stokes-Einstein equation can be adapted to estimate the diffusivity of a solute (cytokine):

$$\mathcal{D}_{eff} = \frac{\kappa T}{6\pi R_h \mu_B}$$

where  $\kappa$  is Boltzmann's constant,  $T$  is temperature, and  $\mu_B$  is the viscosity of the bulk fluid and  $R_h$  is the Stokes, or hydraulic, radius of the particle. We use published data to estimate  $\mathcal{D}_{eff}$ . This allowed us to estimate the diffusion speeds of antivirals and virus in a 0.6% agarose gel as used experimentally, shown in Table 1.

**Table 1:** Diffusion calculations for virus (upper table) and antiviral molecules (lower table) in media and in 0.6% agar gels.

|                            | <b>Particle shape/size (nm)</b>                                                                              | <b>Diffusivity (<math>\mu\text{m}^2/\text{sec}</math>)</b> | <b>Source</b>                                                             |
|----------------------------|--------------------------------------------------------------------------------------------------------------|------------------------------------------------------------|---------------------------------------------------------------------------|
| T4 phage in 1% agar        | 80x100 nm + 120 nm long tail                                                                                 | 1.9                                                        | Experimentally determined (Hu et al., 2010)                               |
| Nanobeads in 0.6% agar     | Spherical beads 100 nm in diameter                                                                           | ~0.75                                                      | Experimentally determined in 0-3% agarose gels. (Yakimovich et al., 2012) |
|                            | <b>Particle shape/size (nm)</b>                                                                              | <b>Diffusivity (<math>\mu\text{m}^2/\text{sec}</math>)</b> | <b>Source</b>                                                             |
| IFN in water/agar*         | IFN $\alpha$ :<br>MW = 19.2 kDa<br>$R_h$ = 2.12 nm<br>(Grace et al., 2005)<br>IFN $\beta$ :<br>MW = 18.5 kDa | 158.8                                                      | Stokes-Einstein for sphere of radius 2.12 nm in water at 37°C.            |
| Lactalbumin in water/agar* | Lactalbumin:<br>MW = 14.2 kDa<br>$R_h$ = 1.90-2.12 nm<br>(Pluen et al., 1999)                                | 114-130                                                    | Experimentally determined (Saltzman et al., 1994) (Pluen et al., 1999)    |

\*At a hydraulic radius of 2.12 nm, there should be little impedance of diffusion due to agar gels or other matrices with similar pore size, including biologically-derived matrices such as human cervical mucus (Pluen et al., 1999; Saltzman et al., 1994). Thus the diffusivity of interferon in water should be similar to that in agar.

\*\*the width of one A549 cell is approximately 12  $\mu\text{m}$  (Jiang et al., 2010).

## Supplemental References

Grace, M.J., Lee, S., Bradshaw, S., Chapman, J., Spond, J., Cox, S., DeLorenzo, M., Brassard, D., Wylie, D., Cannon-Carlson, S., Cullen, C., Indelicato, S., Voloch, M., Bordens, R., 2005. Site of pegylation and polyethylene glycol molecule size attenuate interferon-alpha antiviral and antiproliferative activities through the JAK/STAT signaling pathway. *Journal of Biological Chemistry* 280, 6327-6336.

Hu, J., Miyanaga, K., Tanji, Y., 2010. Diffusion Properties of Bacteriophages Through Agarose Gel Membrane. *Biotechnology Progress* 26, 1213-1221.

Jiang, R.D., Shen, H., Piao, Y.J., 2010. The morphometrical analysis on the ultrastructure of A549 cells. *Romanian Journal of Morphology and Embryology* 51, 663-667.

Ortega-Cejas, V., Fort, J., Mendez, V., Campos, D., 2004. Approximate solution to the speed of spreading viruses. *Physical Review E* 69.

Pluen, A., Netti, P.A., Jain, R.K., Berk, D.A., 1999. Diffusion of macromolecules in agarose gels: Comparison of linear and globular configurations. *Biophysical Journal* 77, 542-552.

Saltzman, W.M., Radomsky, M.L., Whaley, K.J., Cone, R.A., 1994. Antibody diffusion in human cervical mucus. *Biophysical Journal* 66, 508-515.

Yakimovich, A., Gumpert, H., Burckhardt, C.J., Lutschg, V.A., Jurgeit, A., Sbalzarini, I.F., Greber, U.F., 2012. Cell-Free Transmission of Human Adenovirus by Passive Mass Transfer in Cell Culture Simulated in a Computer Model. *J Virol* 86, 10123-10137.
